# Supplementary material for: Biological production and downstream separation of xylitol using Candida tropicalis
Source: Royal Society of Chemistry journal article supplement (doi:10.1039/d6ra02090a), 2026-05-26
Supplement: d6ra02090a1.pdf [file d6ra02090a1.pdf]

1 Supplemental Information for

2 **Biological Production and Downstream Separation of Xylitol using *Candida tropicalis***

3

4 Sarvada Chipkar<sup>†</sup>, Claire E. Richter<sup>†</sup>, Charlotte A. Tonelli<sup>†</sup>, Luke W. Baxter<sup>†</sup>, Melanie H. Cotta<sup>†</sup>,  
5 Isabella C. Doyle<sup>†</sup>, William P. Rice<sup>†</sup>, Gillian I. Mohr<sup>†</sup>, Avery W. Suza<sup>†</sup>, Emma C. Brace<sup>†\*</sup>

6 <sup>†</sup> Department of Engineering, Morrissey College of Arts and Sciences, Boston College, 140  
7 Commonwealth Avenue, Chestnut Hill, MA 02467 USA.

8 \* Corresponding author: emma.brace@bc.edu, +1-617-552-6153

9

10 **Table 1A.** Descriptive ANOVA statistics for Figure 3 data on xylitol concentrations under  
11 different fermentation conditions measured using a D-sorbitol/D-xylitol assay kit

12 (Megazyme/Neogen).

|                         | N Analysis | N Missing | Mean     | Standard Deviation | SE of Mean |
|-------------------------|------------|-----------|----------|--------------------|------------|
| 16hr 10g/L xylose       | 3          | 0         | 3.38333  | 1.95065            | 1.12621    |
| 16hr NaOH 10g/L xylose  | 3          | 0         | 4.98333  | 0.78213            | 0.45157    |
| PBS 16 hr 10 g/L xylose | 3          | 0         | 2.07667  | 0.59518            | 0.34362    |
| 16 hr 30 g/L xylose     | 3          | 0         | 4.45067  | 3.24691            | 1.8746     |
| 16hr NaOH 30g/L xylose  | 3          | 0         | 9.13333  | 1.90875            | 1.10202    |
| PBS 16 hr 30 g/L xylose | 3          | 0         | 2.89333  | 0.83716            | 0.48333    |
| 40hr 10g/L xylose       | 3          | 0         | 7.34333  | 3.08703            | 1.7823     |
| 40hr NaOH 10g/L xylose  | 3          | 0         | 7.97667  | 3.73176            | 2.15453    |
| PBS 40 hr 10 g/L xylose | 3          | 0         | 2.56     | 0.3651             | 0.21079    |
| 40 hr 30 g/L xylose     | 3          | 0         | 13.86667 | 1.70098            | 0.98206    |
| 40 hr NaOH 30g/L xylose | 3          | 0         | 19.16667 | 7.75263            | 4.47599    |
| PBS 40 hr 30 g/L xylose | 3          | 0         | 6.71333  | 1.05368            | 0.60834    |
| 72hr 10g/L xylose       | 3          | 0         | 5.6      | 1.92533            | 1.11159    |
| 72hr NaOH 10g/L xylose  | 3          | 0         | 9.25667  | 1.1767             | 0.67937    |
| PBS 72 hr 10 g/L xylose | 3          | 0         | 2.79333  | 0.34269            | 0.19785    |
| 72 hr 30 g/L xylose     | 3          | 0         | 15.9     | 3.11929            | 1.80093    |
| 72 hr NaOH 30g/L xylose | 3          | 0         | 21.36667 | 3.99291            | 2.30531    |
| PBS 72 hr 30 g/L xylose | 3          | 0         | 6.33333  | 0.90007            | 0.51966    |
| 96hr 10g/L xylose       | 3          | 0         | 4.725    | 1.95888            | 1.13096    |
| 96hr NaOH 10g/L xylose  | 3          | 0         | 7.60333  | 4.63062            | 2.67349    |
| PBS 96 hr 10 g/L xylose | 3          | 0         | 3.05333  | 0.46436            | 0.2681     |
| 96hr 30 g/L xylose      | 3          | 0         | 12.84333 | 4.72225            | 2.72639    |
| 96 hr NaOH 30g/L xylose | 3          | 0         | 17.13333 | 6.49333            | 3.74893    |
| PBS 96 hr 30 g/L xylose | 3          | 0         | 8.79     | 2.72776            | 1.57488    |

13

14

15

16

17

18 Overall ANOVA

|       | <b>DF</b> | <b>Sum of Squares</b> | <b>Mean Square</b> | <b>F Value</b> | <b>Prob&gt;F</b> |
|-------|-----------|-----------------------|--------------------|----------------|------------------|
| Model | 23        | 2144.33677            | 93.23203           | 9.46337        | <0.0001          |
| Error | 48        | 472.89025             | 9.85188            |                |                  |
| Total | 71        | 2617.22703            |                    |                |                  |

19

20 Null Hypothesis: The means of all levels are equal.

21 Alternative Hypothesis: The means of one or more levels are different.

22 At the 0.05 level, the population means are significantly different.

23

24 Fit Statistics

| <b>R-Square</b> | <b>Coeff Var</b> | <b>Root MSE</b> | <b>Data Mean</b> |
|-----------------|------------------|-----------------|------------------|
| 0.81932         | 0.37675          | 3.13877         | 8.33107          |

25

26 Means Comparisons Grouping Letter Tukey Test

|                                     | <b>Mean</b> | <b>Groups</b> |   |   |   |   |   |
|-------------------------------------|-------------|---------------|---|---|---|---|---|
| 72 hr NaOH 30g/L xylose             | 21.36667    | A             |   |   |   |   |   |
| 40 hr NaOH 30g/L xylose             | 19.16667    | A             |   |   |   |   |   |
| 96 hr NaOH 30 g/L xylose            | 17.13333    | A             | B |   |   |   |   |
| 72 hr 30 g/L xylose                 | 15.9        | A             | B | C |   |   |   |
| 40 hr 30 g/L xylose                 | 13.86667    | A             | B | C | D |   |   |
| 96 hr 30 g/L xylose                 | 12.84333    | A             | B | C | D | E |   |
| 72 hr NaOH 10g/L xylose             | 9.25667     |               | B | C | D | E | F |
| 30g/L xylose (pH using NaOH)        | 9.13333     |               | B | C | D | E | F |
| PBS 96 hr 30 g/L xylose             | 8.79        |               | B | C | D | E | F |
| 40 hr NaOH 10g/L xylose             | 7.97667     |               | B | C | D | E | F |
| 96 hr NaOH 10g/L xylose             | 7.60333     |               | B | C | D | E | F |
| 40hr 10g/L xylose                   | 7.34333     |               | B | C | D | E | F |
| PBS 40 hr 30 g/L xylose             | 6.71333     |               |   | C | D | E | F |
| PBS 72 hr 30 g/L xylose             | 6.33333     |               |   | C | D | E | F |
| 72hr 10g/L xylose                   | 5.6         |               |   |   | D | E | F |
| 10g/L xylose (pH using NaOH)        | 4.98333     |               |   |   | D | E | F |
| 96hr 10g/L xylose                   | 4.725       |               |   |   | D | E | F |
| 30 g/L xylose                       | 4.45067     |               |   |   | D | E | F |
| 10 g/L xylose                       | 3.38333     |               |   |   |   | E | F |
| PBS 96 hr 10 g/L xylose             | 3.05333     |               |   |   |   | E | F |
| 30 g/L xylose (pH using PBS buffer) | 2.89333     |               |   |   |   |   | F |
| PBS 72 hr 10 g/L xylose             | 2.79333     |               |   |   |   |   | F |
| PBS 40 hr 10 g/L xylose             | 2.56        |               |   |   |   |   | F |
| 10 g/L xylose (pH using PBS buffer) | 2.07667     |               |   |   |   |   | F |

27

Means that do not share a letter are significantly different.

28

29 Sig equals 1 indicates that the difference of the means is significant at the 0.05 level.

30 Sig equals 0 indicates that the difference of the means is not significant at the 0.05 level.

31 **Table 2A.** Descriptive ANOVA statistics for Figure 6 data on Xylitol concentration in ion-  
 32 exchange eluents as measured by HPLC.

|                  | <b>N Analysis</b> | <b>N Missing</b> | <b>Mean</b> | <b>Standard Deviation</b> | <b>SE of Mean</b> |
|------------------|-------------------|------------------|-------------|---------------------------|-------------------|
| Initial A        | 6                 | 0                | 4.51742     | 0.28806                   | 0.1176            |
| elution 1 A      | 6                 | 0                | 0.01686     | 0                         | 0                 |
| elution 2 A      | 6                 | 0                | 0.12702     | 0.0925                    | 0.03776           |
| water wash 1-1 A | 6                 | 0                | 0.95906     | 0.08104                   | 0.03308           |
| water wash 1-2 A | 6                 | 0                | 1.97462     | 0.93438                   | 0.38146           |
| water wash 2-1 A | 6                 | 0                | 2.16762     | 1.30339                   | 0.53211           |
| water wash 2-2 A | 6                 | 0                | 1.99396     | 0.53944                   | 0.22023           |
| water wash 3-1 A | 6                 | 0                | 1.03273     | 0.35692                   | 0.14571           |
| water wash 3-2 A | 6                 | 0                | 0.65181     | 0.06964                   | 0.02843           |
| Initial B        | 6                 | 0                | 3.8404      | 0.36812                   | 0.15028           |
| elution 1 B      | 6                 | 0                | 0.01686     | 0                         | 0                 |
| elution 2 B      | 6                 | 0                | 0.01686     | 0                         | 0                 |
| water wash 1-1   | 6                 | 0                | 0.53911     | 0.31392                   | 0.12816           |
| water wash 1-2 B | 6                 | 0                | 1.91595     | 0.46823                   | 0.19116           |
| water wash 2-1 B | 6                 | 0                | 2.52216     | 0.54088                   | 0.22081           |
| water wash 2-2 B | 6                 | 0                | 1.93359     | 0.28493                   | 0.11632           |
| water wash 3-1 B | 6                 | 0                | 1.05321     | 0.21192                   | 0.08652           |
| water wash 3-2 B | 6                 | 0                | 0.50032     | 0.12524                   | 0.05113           |

33

34 Overall ANOVA

|       | <b>DF</b> | <b>Sum of Squares</b> | <b>Mean Square</b> | <b>F Value</b> | <b>Prob&gt;F</b> |
|-------|-----------|-----------------------|--------------------|----------------|------------------|
| Model | 17        | 171.94308             | 10.1143            | 45.73288       | <0.0001          |
| Error | 90        | 19.90443              | 0.22116            |                |                  |
| Total | 107       | 191.84751             |                    |                |                  |

35 Null Hypothesis: The mean of all levels are equal.

36 Alternative Hypothesis: The means of one or more levels are different.

37 At the 0.05 level, the population means are significantly different.

38

39 Fit Statistics

| <b>R-Square</b> | <b>Coeff Var</b> | <b>Root MSE</b> | <b>Data Mean</b> |
|-----------------|------------------|-----------------|------------------|
| 0.89625         | 0.32836          | 0.47028         | 1.4322           |

40

41

42 Means Comparisons Grouping Letter Tukey Test

|                  | Mean    | Groups |   |   |   |   |   |
|------------------|---------|--------|---|---|---|---|---|
| initial A        | 4.51742 | A      |   |   |   |   |   |
| initial B        | 3.8404  | A      |   |   |   |   |   |
| water wash 2-1 B | 2.52216 |        | B |   |   |   |   |
| water wash 2-1 A | 2.16762 |        | B |   |   |   |   |
| water wash 2-2 A | 1.99396 |        | B | C |   |   |   |
| water wash 1-2 A | 1.97462 |        | B | C |   |   |   |
| water wash 2-2 B | 1.93359 |        | B | C | D |   |   |
| water wash 1-2 B | 1.91595 |        | B | C | D |   |   |
| water wash 3-1 B | 1.05321 |        |   | C | D | E |   |
| water wash 3-1 A | 1.03273 |        |   | C | D | E |   |
| water wash 1-1 A | 0.95906 |        |   |   | D | E | F |
| water wash 3-2 A | 0.65181 |        |   |   |   | E | F |
| water wash 1-1 B | 0.53911 |        |   |   |   | E | F |
| water wash 3-2 B | 0.50032 |        |   |   |   | E | F |
| elution 2 A      | 0.12702 |        |   |   |   | E | F |
| elution 1 B      | 0.01686 |        |   |   |   |   | F |
| elution 1 A      | 0.01686 |        |   |   |   |   | F |
| elution 2 B      | 0.01686 |        |   |   |   |   | F |

43 Means that do not share a letter are statistically significant.

44

45 Sig equals 1 indicates that the difference of the means is significant at the 0.05 level.

46 Sig equals 0 indicates that the difference of the means is not significant at the 0.05 level.

47

48

49 **Table 3A.** Descriptive ANOVA statistics for Figure 7 data on Xylitol mass balance over the ion  
 50 exchange separation experiments at different retention times (1, 3, and 10 minutes) for 10g/L  
 51 initial xylose loading without pH control.

|                    | <b>N Analysis</b> | <b>N Missing</b> | <b>Mean</b> | <b>Standard Deviation</b> | <b>SE of Mean</b> |
|--------------------|-------------------|------------------|-------------|---------------------------|-------------------|
| TR 1 Sample Eluent | 3                 | 0                | 0           | 0                         | 0                 |
| TR1 WW1            | 3                 | 0                | 20.46667    | 2.89885                   | 1.67365           |
| TR1 WW2            | 3                 | 0                | 44.53333    | 1.32791                   | 0.76667           |
| TR1 WW3            | 3                 | 0                | 17.46667    | 2.43379                   | 1.40515           |
| TR1 Unaccounted    | 3                 | 0                | 17.53333    | 1.55349                   | 0.89691           |
| TR3 Sample Eluent  | 3                 | 0                | 0           | 0                         | 0                 |
| TR3 WW1            | 3                 | 0                | 21.7        | 4.07799                   | 2.35443           |
| TR3 WW2            | 3                 | 0                | 48.03333    | 0.90738                   | 0.52387           |
| TR3 WW3            | 3                 | 0                | 15.13333    | 11.9098                   | 6.87613           |
| TR3 Unaccounted    | 3                 | 0                | 15.13333    | 7.00309                   | 4.04324           |
| TR10 Sample Eluent | 3                 | 0                | 0           | 0                         | 0                 |
| TR10 WW1           | 3                 | 0                | 24.8        | 5.05074                   | 2.91605           |
| TR10 WW2           | 3                 | 0                | 49.7        | 4.88672                   | 2.82135           |
| TR10 WW3           | 3                 | 0                | 17.36667    | 0.35119                   | 0.20276           |
| TR10 Unaccounted   | 3                 | 0                | 8.13333     | 9.3586                    | 5.40319           |

52

53 Overall ANOVA

|       | <b>DF</b> | <b>Sum of Squares</b> | <b>Mean Square</b> | <b>F Value</b> | <b>Prob&gt;F</b> |
|-------|-----------|-----------------------|--------------------|----------------|------------------|
| Model | 14        | 11110.84              | 793.63143          | 32.70998       | <0.0001          |
| Error | 30        | 727.88                | 24.26267           |                |                  |
| Total | 44        | 11838.72              |                    |                |                  |

54

55 Null Hypothesis: The means of all levels are equal.

56 Alternative Hypothesis: The means of one or more levels are different.

57 At the 0.05 level, the population means are significantly different.

58

59 Fit Statistics

| <b>R-Square</b> | <b>Coeff Var</b> | <b>Root MSE</b> | <b>Data Mean</b> |
|-----------------|------------------|-----------------|------------------|
| 0.093852        | 0.24629          | 4.92571         | 20               |

60

61

62 Means Comparisons Grouping Let Tukey Test

|          | <b>Mean</b> | <b>Groups</b> |   |   |
|----------|-------------|---------------|---|---|
| TR10 WW2 | 49.7        | A             |   |   |
| TR3 WW2  | 48.03333    | A             |   |   |
| TR1 WW2  | 44.53333    | A             |   |   |
| TR10 WW1 | 24.8        |               | B |   |
| TR3 WW1  | 21.7        |               | B | C |
| TR1 WW1  | 20.46667    |               | B | C |

|                    |          |  |   |   |   |
|--------------------|----------|--|---|---|---|
| TR1 Unaccounted    | 17.53333 |  | B | C |   |
| TR1 WW3            | 17.46667 |  | B | C |   |
| TR10 WW3           | 17.36667 |  | B | C |   |
| TR3 Unaccounted    | 15.13333 |  | B | C |   |
| TR3 WW3            | 15.13333 |  | B | C |   |
| TR10 Unaccounted   | 8.13333  |  |   | C | D |
| TR10 Sample Eluent | 0        |  |   |   | D |
| TR3 Sample Eluent  | 0        |  |   |   | D |
| TR1 Sample Eluent  | 0        |  |   |   | D |

63 Means that do not share a letter are significantly different.

64

65 Sig equals 1 indicates that the difference of the means is significant at the 0.05 level.

66 Sig equals 0 indicates that the difference of the means is not significant at the 0.05 level.

67

68

69

70 **Table 3B.** Descriptive ANOVA statistics for Figure 7 data on Xylitol mass balance over the ion  
 71 exchange separation experiments at different retention times (1, 3, and 10 minutes) for 10g/L  
 72 initial xylose loading with pH control using sodium hydroxide.

|                    | <b>N Analysis</b> | <b>N Missing</b> | <b>Mean</b> | <b>Standard Deviation</b> | <b>SE of Mean</b> |
|--------------------|-------------------|------------------|-------------|---------------------------|-------------------|
| TR1 Sample Eluent  | 3                 | 0                | 0           | 0                         | 0                 |
| TR1 WW1            | 3                 | 0                | 15.31333    | 5.55271                   | 3.20586           |
| TR1 WW2            | 3                 | 0                | 43.9        | 3.53836                   | 2.04287           |
| TR1 WW3            | 3                 | 0                | 26.14333    | 2.41798                   | 1.39602           |
| TR1 Unaccounted    | 3                 | 0                | 14.61       | 6.81075                   | 3.93219           |
| TR3 Sample Eluent  | 3                 | 0                | 0           | 0                         | 0                 |
| TR3 WW1            | 3                 | 0                | 13.63333    | 6.38148                   | 3.68435           |
| TR3 WW2            | 3                 | 0                | 40          | 9.4016                    | 5.42801           |
| TR3 WW3            | 3                 | 0                | 36.33333    | 22.18881                  | 12.81072          |
| TR3 Unaccounted    | 3                 | 0                | 10.03333    | 9.35753                   | 5.50257           |
| TR10 Sample Eluent | 3                 | 0                | 0           | 0                         | 0                 |
| TR10 WW1           | 3                 | 0                | 17.46667    | 3.38575                   | 1.9577            |
| TR10 WW2           | 3                 | 0                | 46.1        | 1.12694                   | 0.65064           |
| TR10 WW3           | 3                 | 0                | 25.33333    | 1.40475                   | 0.81104           |
| TR10 Unaccounted   | 3                 | 0                | 11.2        | 2.04206                   | 1.17898           |

73  
 74 Overall ANOVA

|       | <b>DF</b> | <b>Sum of Squares</b> | <b>Mean Square</b> | <b>F Value</b> | <b>Prob&gt;F</b> |
|-------|-----------|-----------------------|--------------------|----------------|------------------|
| Model | 14        | 10385.68891           | 741.83492          | 13.51277       | <0.0001          |
| Error | 30        | 1646.96427            | 54.89881           |                |                  |
| Total | 44        | 12032.65318           |                    |                |                  |

75 Null Hypothesis: The mean of all levels are equal.  
 76 Alternative Hypothesis: The means of one or more levels are different.  
 77 At the 0.05 level, the population means are significantly different.

78  
 79 Fit Statistics

| <b>R-Square</b> | <b>Coeff Var</b> | <b>Root MSE</b> | <b>Data Mean</b> |
|-----------------|------------------|-----------------|------------------|
| 0.086313        | 0.37051          | 7.40937         | 19.99778         |

80  
 81 Grouping Let  
 82 Tukey Test

|          | <b>Mean</b> | <b>Groups</b> |   |   |   |
|----------|-------------|---------------|---|---|---|
| TR10 WW2 | 46.1        | A             |   |   |   |
| TR1 WW2  | 43.9        | A             |   |   |   |
| TR3 WW2  | 40          | A             |   |   |   |
| TR3 WW3  | 36.33333    | A             | B |   |   |
| TR1 WW3  | 26.14333    | A             | B | C |   |
| TR10 WW3 | 25.33333    | A             | B | C |   |
| TR10 WW1 | 17.46667    |               | B | C | D |

|                    |          |  |   |   |   |
|--------------------|----------|--|---|---|---|
| TR1 WW1            | 15.3133  |  | B | C | D |
| TR1 Unaccounted    | 14.61    |  | B | C | D |
| TR3 WW1            | 13.63333 |  |   | C | D |
| TR10 Unaccounted   | 11.1     |  |   | C | D |
| TR3 Unaccounted    | 10.03333 |  |   | C | D |
| TR10 Sample Eluent | 0        |  |   |   | D |
| TR3 Sample Eluent  | 0        |  |   |   | D |
| TR1 Sample Eluent  | 0        |  |   |   | D |

83 Means that do not share a letter are statistically significant.

84

85 Sig equals 1 indicates that the difference of the means is significant at the 0.05 level.

86 Sig equals 0 indicates that the difference of the means is not significant at the 0.05 level.

87
